# Supplementary material
Source: PubMed Central journal article supplement (PMC6913887)

# NMR Reveals an Undeclared Constituent in Custom Synthetic Peptides

Mary P. Choules,<sup>a,b</sup> Jonathan Bisson,<sup>a,b,c</sup> Charlotte Simmler,<sup>a,b,c</sup> James B. McAlpine,<sup>a,b,c,d</sup> Gabriel Giancaspro,<sup>e</sup> Anton Bzhelyansky,<sup>e</sup> Matthias Niemitz,<sup>f</sup> Guido F. Pauli<sup>a,b,c,d\*</sup>

<sup>a</sup>Department of Pharmaceutical Sciences, <sup>b</sup>Institute for Tuberculosis Research (ITR), <sup>c</sup>Center for Natural Product Technologies (CENAPT), and <sup>d</sup>Program for Collaboration in the Pharmaceutical Sciences (PCRPS), University of Illinois College of Pharmacy, 833 S. Wood St., Chicago 60612 (IL). <sup>e</sup>The United States Pharmacopeial Convention, 12601 Twinbrook Pkwy., Rockville 20852 (MD). <sup>f</sup>NMR Solutions, Puijonkatu 24 B 5, 70110 Kuopio, Finland

\*Corresponding author at: University of Illinois College of Pharmacy, 833 S. Wood St., Chicago, IL 60612, U.S.A.

*E-mail address:* Guido F. Pauli, gfp@uic.edu (Guido F. Pauli)

Keywords: <sup>1</sup>H NMR, peptides, purity, impurity, residual complexity, custom peptide synthesis.

## Supporting Material

## Table of Contents

|                                                                                                                                                                                                                                             |    |
|---------------------------------------------------------------------------------------------------------------------------------------------------------------------------------------------------------------------------------------------|----|
| Figure S1. MS data of DR provided by the manufacturer. ....                                                                                                                                                                                 | 2  |
| Figure S2. HPLC data of DR provided by the manufacturer. ....                                                                                                                                                                               | 3  |
| Figure S3. MS data of DRVYI provided by the manufacturer. ....                                                                                                                                                                              | 4  |
| Figure S4. HPLC data of DRVYI provided by the manufacturer. ....                                                                                                                                                                            | 5  |
| Figure S5. Full $^1\text{H}$ NMR spectrum of DR (25 mM, 135 $\mu\text{L}$ $\text{D}_2\text{O}$ , 40 $\mu\text{L}$ $\text{CD}_3\text{OD}$ , 3 mm tube) with mannitol impurity at 800 MHz (298K). ....                                        | 6  |
| Figure S6. Full $^1\text{H}$ NMR spectrum of DRVYI (25 mM, 135 $\mu\text{L}$ $\text{D}_2\text{O}$ , 40 $\mu\text{L}$ $\text{CD}_3\text{OD}$ , 3 mm tube) with mannitol impurity at 800 MHz (298K). ....                                     | 6  |
| Figure S7. Full $^1\text{H}/^1\text{H}$ -COSY NMR spectrum of DRVYI (25 mM, 135 $\mu\text{L}$ $\text{D}_2\text{O}$ , 40 $\mu\text{L}$ $\text{CD}_3\text{OD}$ , 3 mm tube) at 800 MHz (298K) with region of mannitol impurity expanded. .... | 7  |
| Figure S8. Full $^1\text{H}$ NMR spectrum of mannitol (58 mg, 600 $\mu\text{L}$ $\text{D}_2\text{O}$ , 5 mm tube) at 800 MHz (305K). .                                                                                                      | 7  |
| Figure S9. $^{13}\text{C}$ -DEPT-Q-135 NMR spectrum of DR (25 mM, 135 $\mu\text{L}$ $\text{D}_2\text{O}$ , 40 $\mu\text{L}$ $\text{CD}_3\text{OD}$ , 3 mm tube) at 225 MHz (298K) with expanded region for the mannitol impurity. ....      | 8  |
| Figure S10. Full $^1\text{H}$ NMR spectrum of DR (25 mM, 135 $\mu\text{L}$ $\text{D}_2\text{O}$ , 40 $\mu\text{L}$ $\text{CD}_3\text{OD}$ , 3 mm tube) with mannitol impurity at 400 MHz (298K). ....                                       | 9  |
| Figure S11. $^1\text{H}/^{13}\text{C}$ -HSQC NMR spectrum of DR (25 mM, 135 $\mu\text{L}$ $\text{D}_2\text{O}$ , 40 $\mu\text{L}$ $\text{CD}_3\text{OD}$ , 3 mm tube) with expansion of the mannitol impurity at 400/100 MHz (298K). ....   | 9  |
| Figure S12. $^1\text{H}/^{13}\text{C}$ -HMBC NMR spectrum of DR (25 mM, 135 $\mu\text{L}$ $\text{D}_2\text{O}$ , 40 $\mu\text{L}$ $\text{CD}_3\text{OD}$ , 3 mm tube) with expansion of the mannitol impurity at 400/100 MHz (298K). ....   | 10 |
| Figure S13. $^1\text{H}$ NMR spectrum of mannitol (5.66 mg, 135 $\mu\text{L}$ $\text{D}_2\text{O}$ , 40 $\mu\text{L}$ $\text{CD}_3\text{OD}$ , 3 mm tube) at 400 MHz (298K). ....                                                           | 10 |
| Figure S14. $^{13}\text{C}$ NMR spectrum of mannitol (5.66 mg, 135 $\mu\text{L}$ $\text{D}_2\text{O}$ , 40 $\mu\text{L}$ $\text{CD}_3\text{OD}$ , 3 mm tube) at 100 MHz (298K). ....                                                        | 11 |
| Figure S15. $^1\text{H}/^{13}\text{C}$ HSQC spectrum of mannitol (5.66 mg, 135 $\mu\text{L}$ $\text{D}_2\text{O}$ , 40 $\mu\text{L}$ $\text{CD}_3\text{OD}$ , 3 mm tube) at 400/100 MHz (298K). ....                                        | 11 |
| Figure S16. $^1\text{H}$ NMR spectra of DR (4 mg, 600 $\mu\text{L}$ , $\text{D}_2\text{O}$ , 5 mm tube) at 60 MHz (305K). ....                                                                                                              | 12 |
| Figure S17. $^1\text{H}$ NMR spectra of DRVYI (4 mg, 600 $\mu\text{L}$ , $\text{D}_2\text{O}$ , 5 mm tube) at 60 MHz (305K). ....                                                                                                           | 12 |
| Figure S18. $^1\text{H}$ NMR spectra of mannitol (58 mg, 600 $\mu\text{L}$ , $\text{D}_2\text{O}$ , 5 mm tube) at 60 MHz (305K). ....                                                                                                       | 12 |
| Figure S19. $^{13}\text{C}$ NMR spectrum of mannitol at 100 MHz (top, black), $^{13}\text{C}$ -DEPT-Q-135 NMR spectrum of DR at 225 MHz (bottom, red). ....                                                                                 | 13 |
| Figure S20. $^1\text{H}$ NMR spectrum of DR (top, black) and mannitol (bottom, red) at 400 MHz. ....                                                                                                                                        | 13 |
| Figure S21. FT-IR chromatogram of DRVY (green) without the impurity versus DR (orange) and DRVYI (red) which both contain the impurity. ....                                                                                                | 14 |
| Figure S22. HiFSA calculated $^1\text{H}$ NMR spectrum of DR (black, top) versus experimental (red, bottom) at 800 MHz. ....                                                                                                                | 15 |
| Figure S23. HiFSA calculated $^1\text{H}$ NMR spectrum of DRVYI (black, top) versus experimental (red, bottom) at 800 MHz. ....                                                                                                             | 15 |
| Figure S24. HiFSA calculated $^1\text{H}$ NMR spectrum of mannitol (black, top) versus experimental (red, bottom) at 60 MHz. ....                                                                                                           | 16 |
| Figure S25. HiFSA calculated $^1\text{H}$ NMR spectrum of mannitol (black, top) versus experimental (red, bottom) at 800 MHz. ....                                                                                                          | 16 |
| Figure S26. MS analysis of DR. ....                                                                                                                                                                                                         | 17 |
| Figure S27. MS analysis of DRVYI with mannitol contaminant. ....                                                                                                                                                                            | 18 |

## QC data provided by the manufacturer of the Synthetic Peptides

### DR:

#### Data Analysis Report:

% of hydrophobic amino acids: 0.00%

% of acidic amino acids: 50.00%

% of basic amino acids: 50.00%

% of neutral amino acids: 0.00%

MS (M+H)<sup>+</sup>: 288.99 (see **Figure S1**)

Purity (HPLC): 98.44% (see **Figure S2**)

HPLC, 220 nm, C18 linear gradient

Column: Boston Green ODS, 4.6\*250 mm, 5 $\mu$ m

Solvent A: 0.1% trifluoroacetic in 100% acetonitrile

Solvent B: 0.1% trifluoroacetic in 100% water

Storage Conditions: -20 °C

Remarks: This product is supplied as trifluoroacetate salt

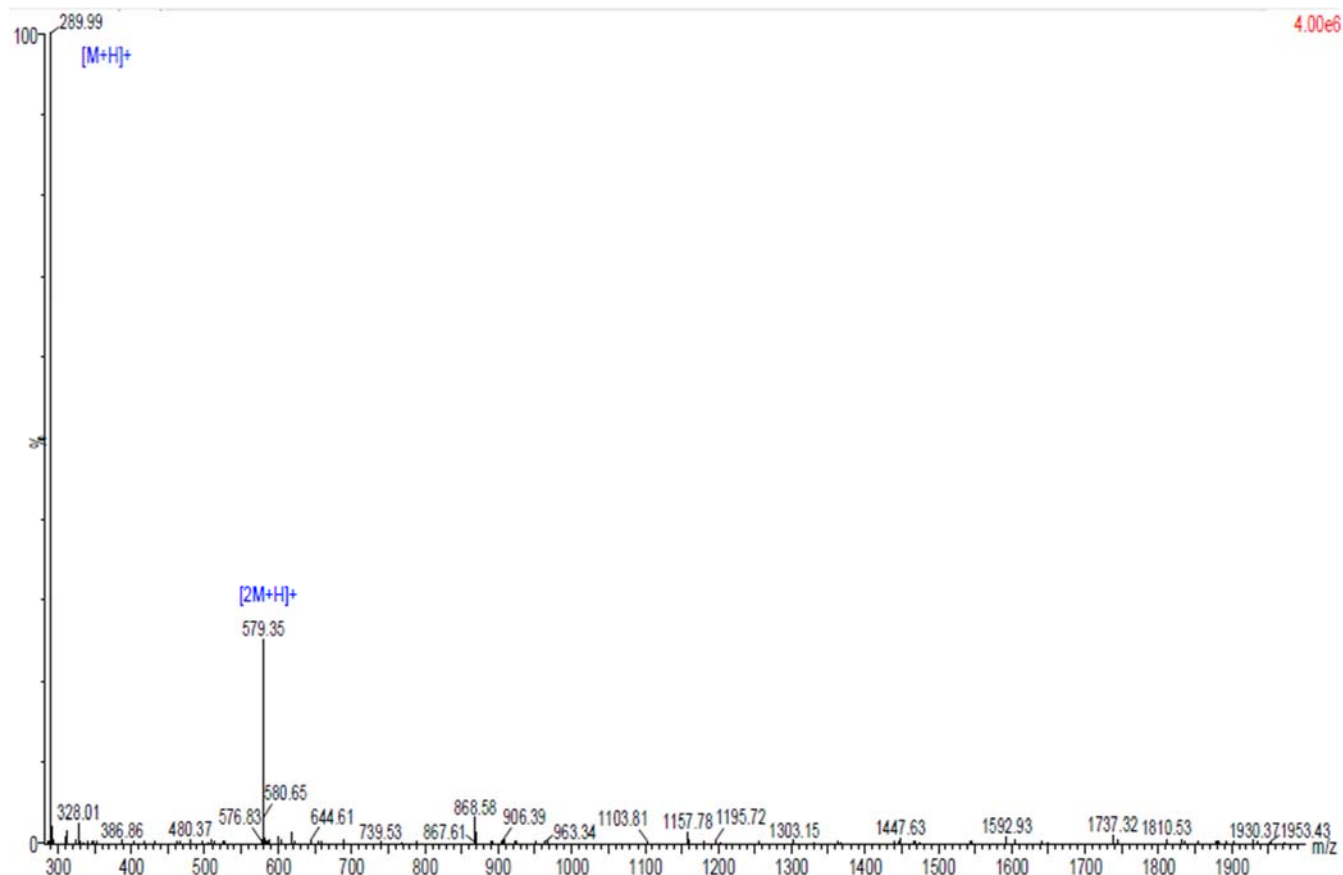

**Figure S1.** MS data of DR provided by the manufacturer.

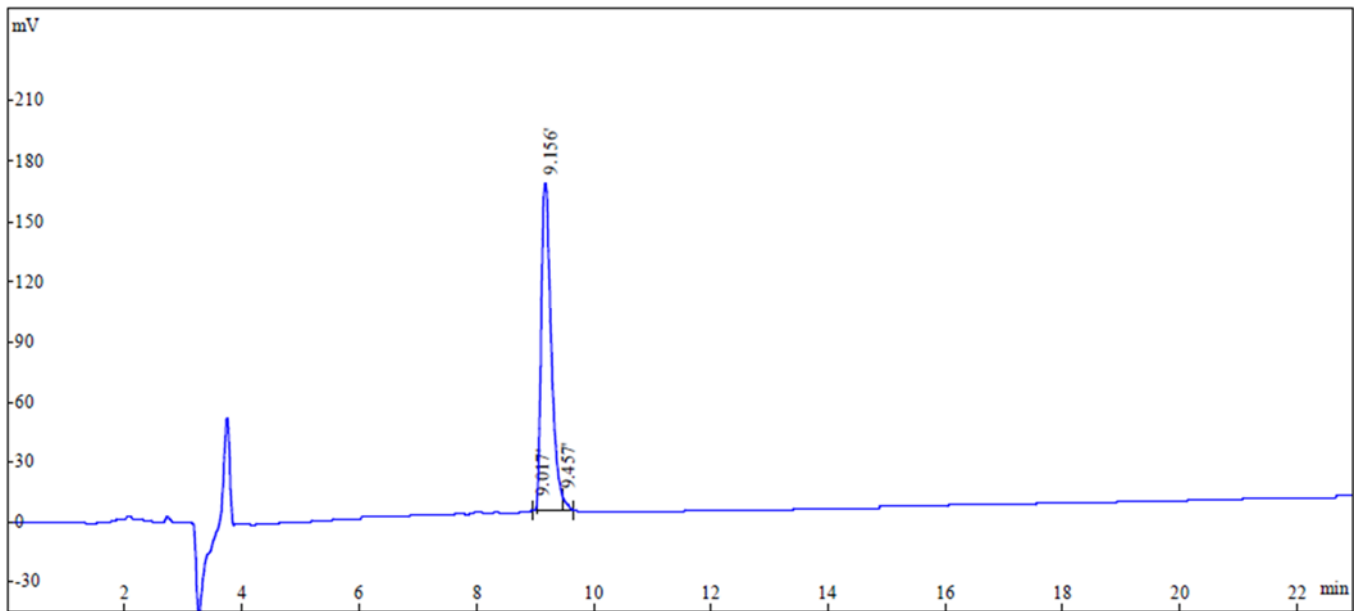

**Figure S2.** HPLC data of DR provided by the manufacturer.

**Table S1.** Table of integrated peaks for HPLC data of DR provided by the manufacturer.

| <b>Time</b>  | <b>Conc.</b> | <b>Area</b> | <b>Height</b> |
|--------------|--------------|-------------|---------------|
| 9.017        | 0.1245       | 2254        | 2790          |
| 9.156        | 98.4496      | 1782930     | 162012        |
| 9.457        | 1.4260       | 25826       | 6209          |
| <b>Total</b> | 100          | 1811010     | 171011        |

## DRVYI:

### Data Analysis Report:

% of hydrophobic amino acids: 60.00%

% of acidic amino acids: 20.00%

% of basic amino acids: 20.00%

% of neutral amino acids: 0.00%

MS (M+H)<sup>+</sup>: 664.50 (see **Figure S3**)

Purity (HPLC): 98.34% (see **Figure S4**)

HPLC, 220 nm, C18 linear gradient

Column: Boston Green ODS, 4.6\*250 mm, 5μm

Solvent A: 0.1% trifluoroacetic in 100% acetonitrile

Solvent B: 0.1% trifluoroacetic in 100% water

Storage Conditions: -20 °C

Remarks: This product is supplied as trifluoroacetate salt

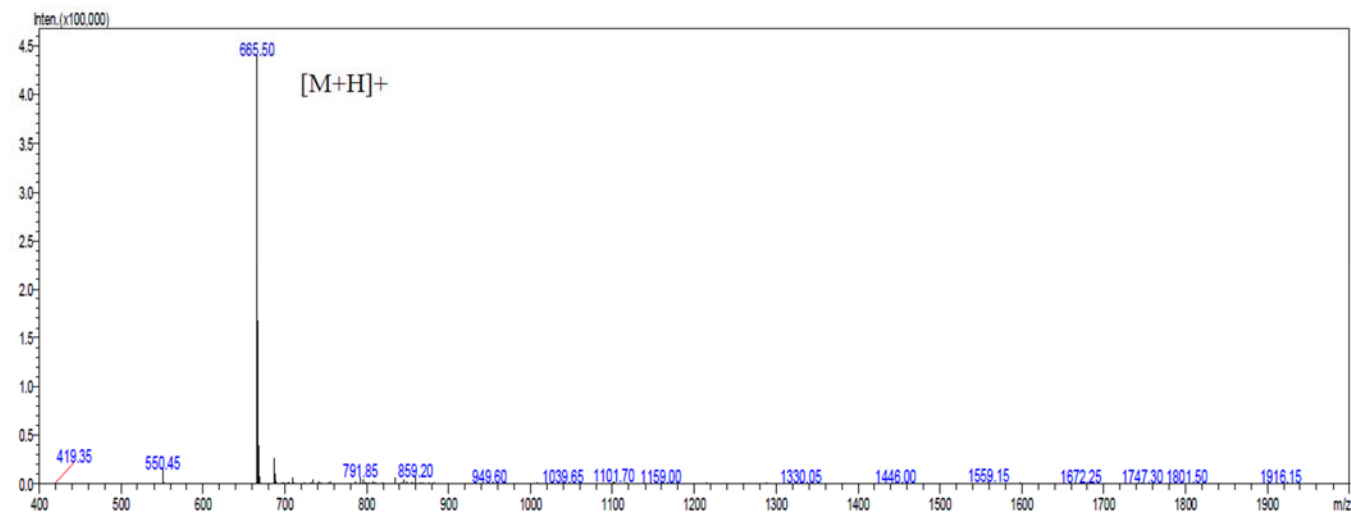

**Figure S3.** MS data of DRVYI provided by the manufacturer.

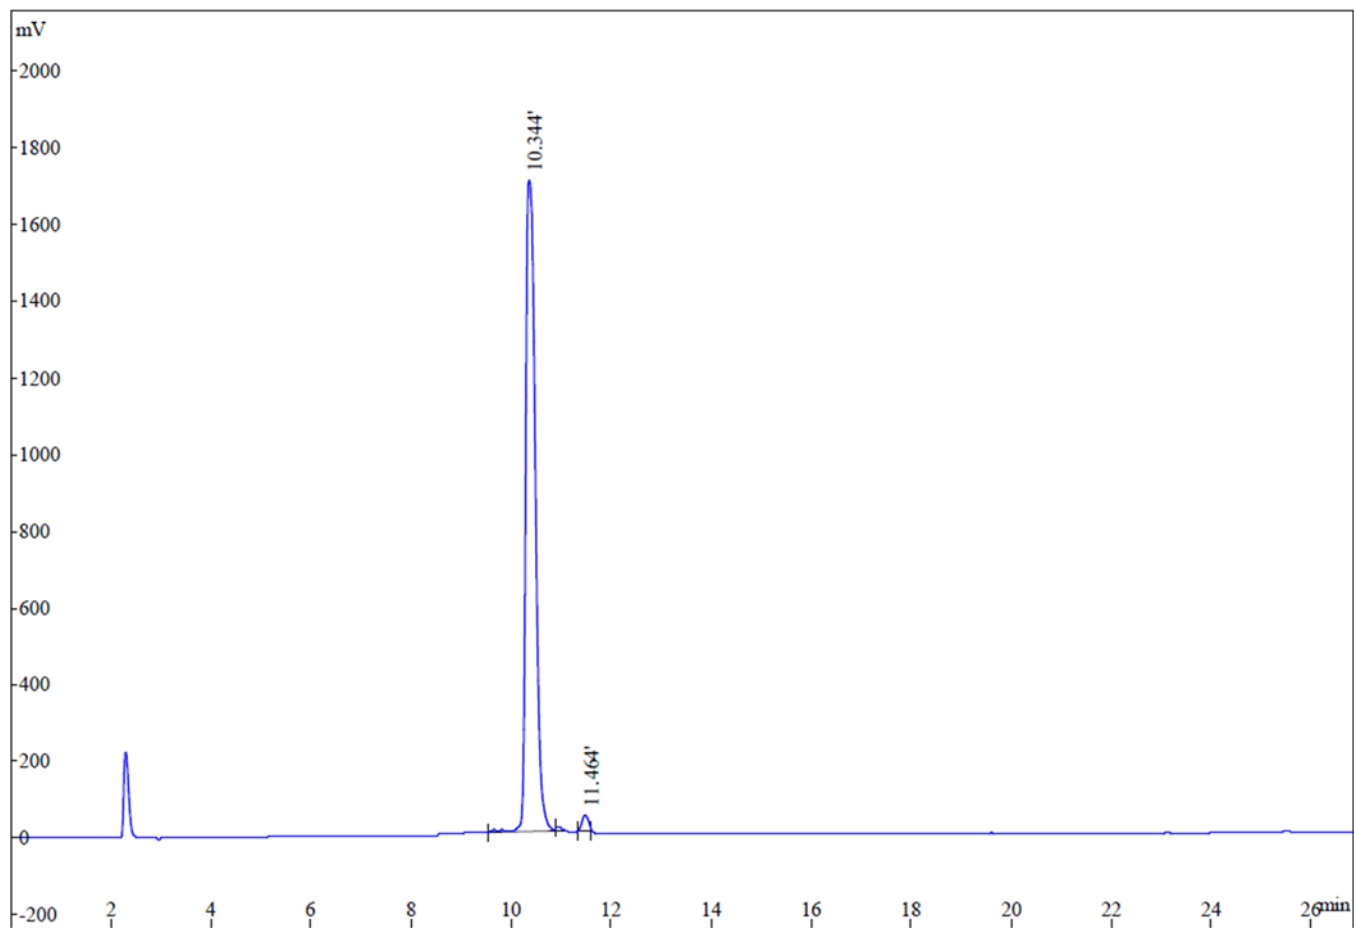

**Figure S4.** HPLC data of DRVYI provided by the manufacturer.

**Table S2.** Table of integrated peaks for HPLC data of DRVYI provided by the manufacturer.

| <b>Time</b>  | <b>Conc.</b> | <b>Area</b> | <b>Height</b> |
|--------------|--------------|-------------|---------------|
| 10.344       | 98.3434      | 19998365    | 1697217       |
| 11.464       | 1.6566       | 336869      | 40936         |
| <b>Total</b> | 100          | 20335234    | 1738153       |

## 800 MHz NMR Data

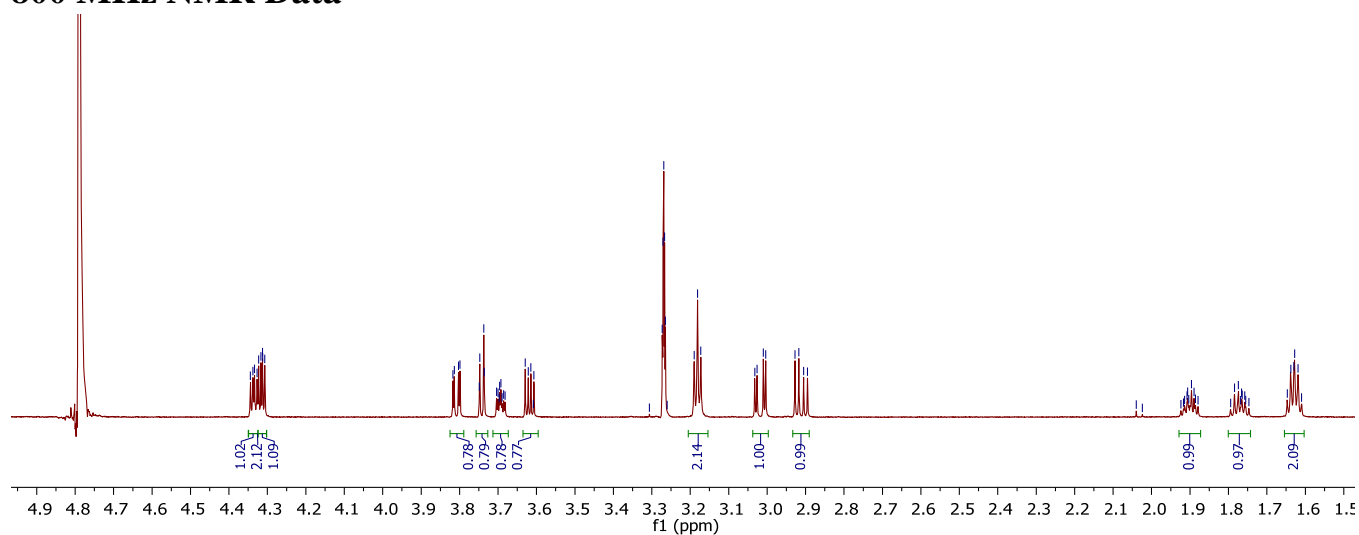

**Figure S5.** Full  $^1\text{H}$  NMR spectrum of DR (25 mM, 135  $\mu\text{L}$   $\text{D}_2\text{O}$ , 40  $\mu\text{L}$   $\text{CD}_3\text{OD}$ , 3 mm tube) with mannitol impurity at 800 MHz (298K).

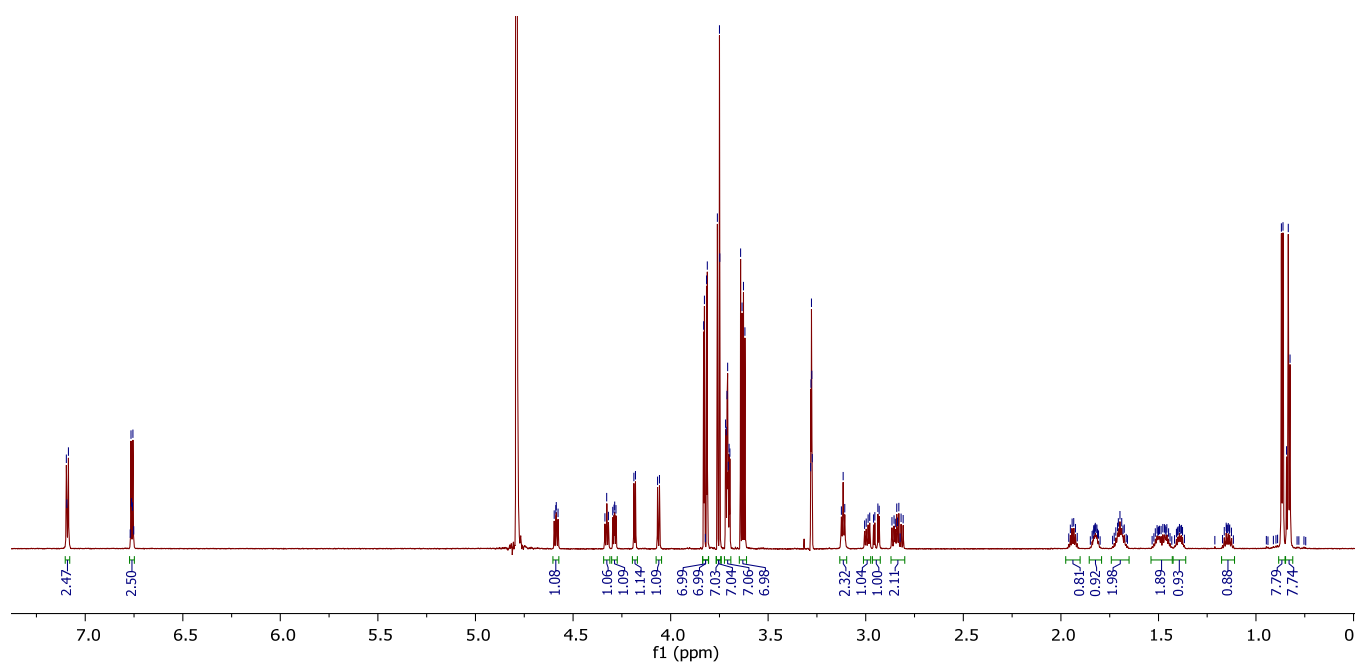

**Figure S6.** Full  $^1\text{H}$  NMR spectrum of DRVYI (25 mM, 135  $\mu\text{L}$   $\text{D}_2\text{O}$ , 40  $\mu\text{L}$   $\text{CD}_3\text{OD}$ , 3 mm tube) with mannitol impurity at 800 MHz (298K).

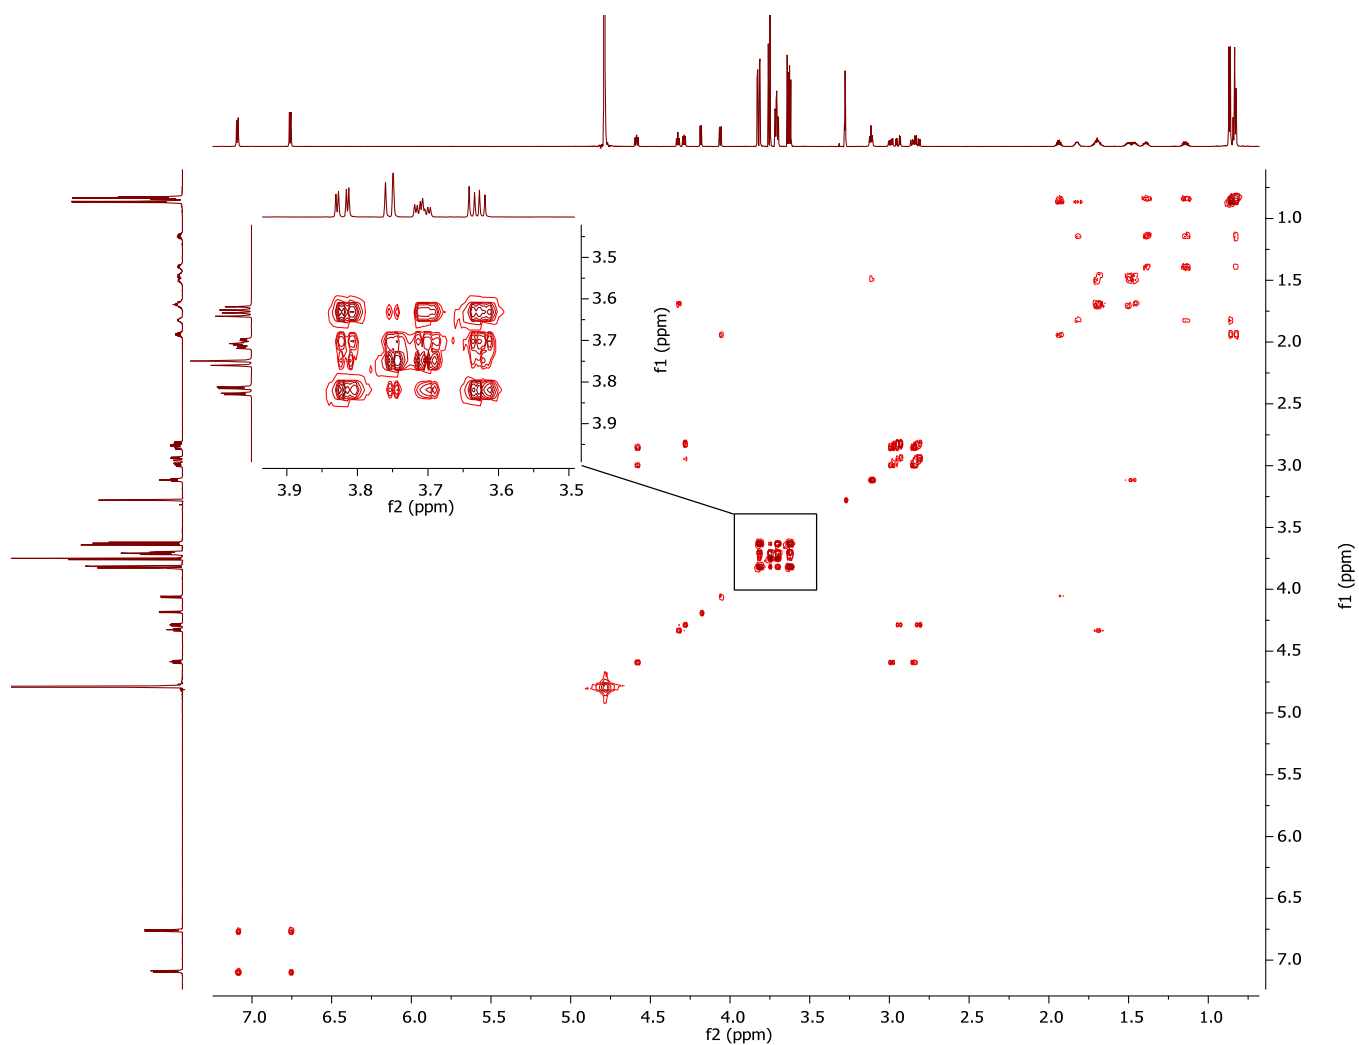

**Figure S7.** Full  $^1\text{H}/^1\text{H}$ -COSY NMR spectrum of DRVYI (25 mM, 135  $\mu\text{L}$   $\text{D}_2\text{O}$ , 40  $\mu\text{L}$   $\text{CD}_3\text{OD}$ , 3 mm tube) at 800 MHz (298K) with region of mannitol impurity expanded.

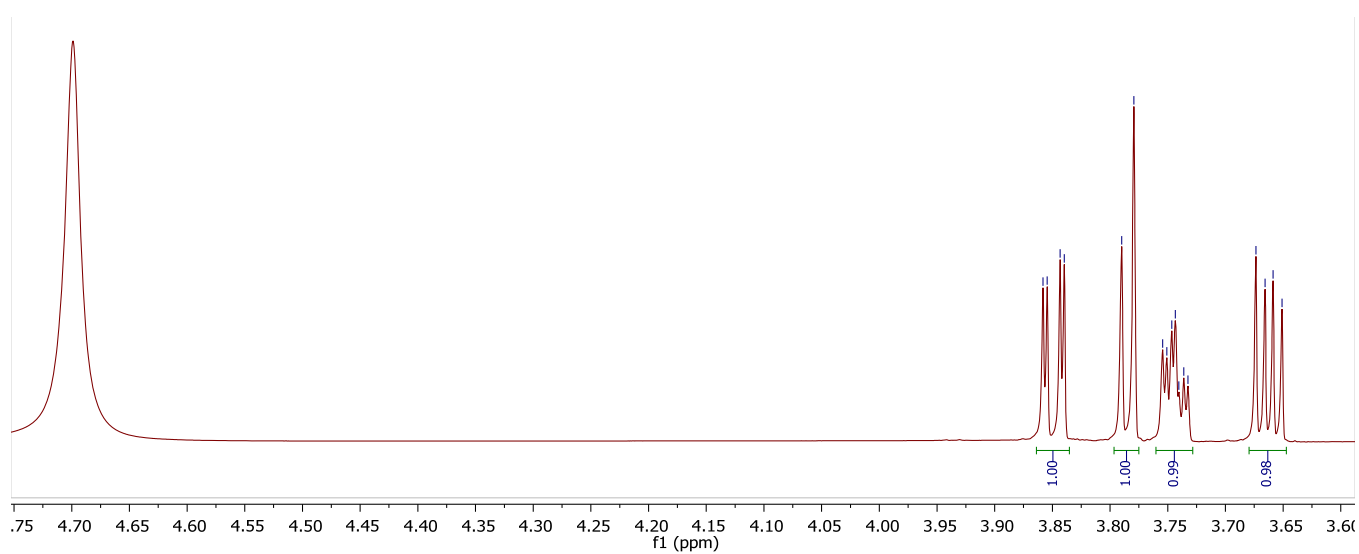

**Figure S8.** Full  $^1\text{H}$  NMR spectrum of mannitol (58 mg, 600  $\mu\text{L}$   $\text{D}_2\text{O}$ , 5 mm tube) at 800 MHz (305K).



# 900 MHz NMR Data

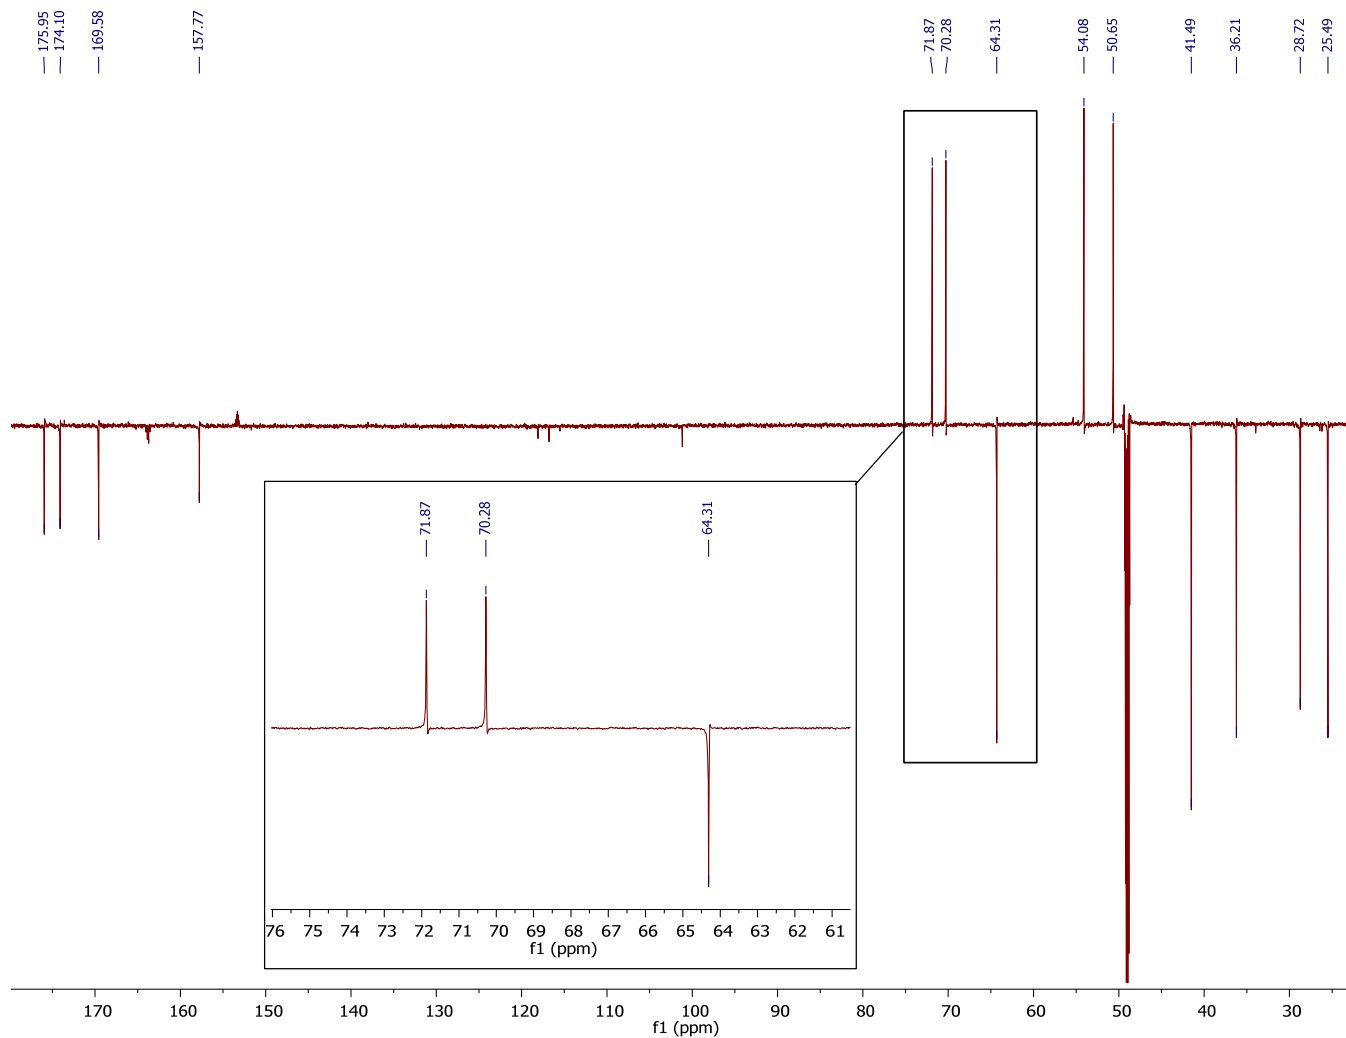

**Figure S9.**  $^{13}\text{C}$ -DEPT-Q-135 NMR spectrum of DR (25 mM, 135  $\mu\text{L}$   $\text{D}_2\text{O}$ , 40  $\mu\text{L}$   $\text{CD}_3\text{OD}$ , 3 mm tube) at 225 MHz (298K) with expanded region for the mannitol impurity.

## 400 MHz NMR Data

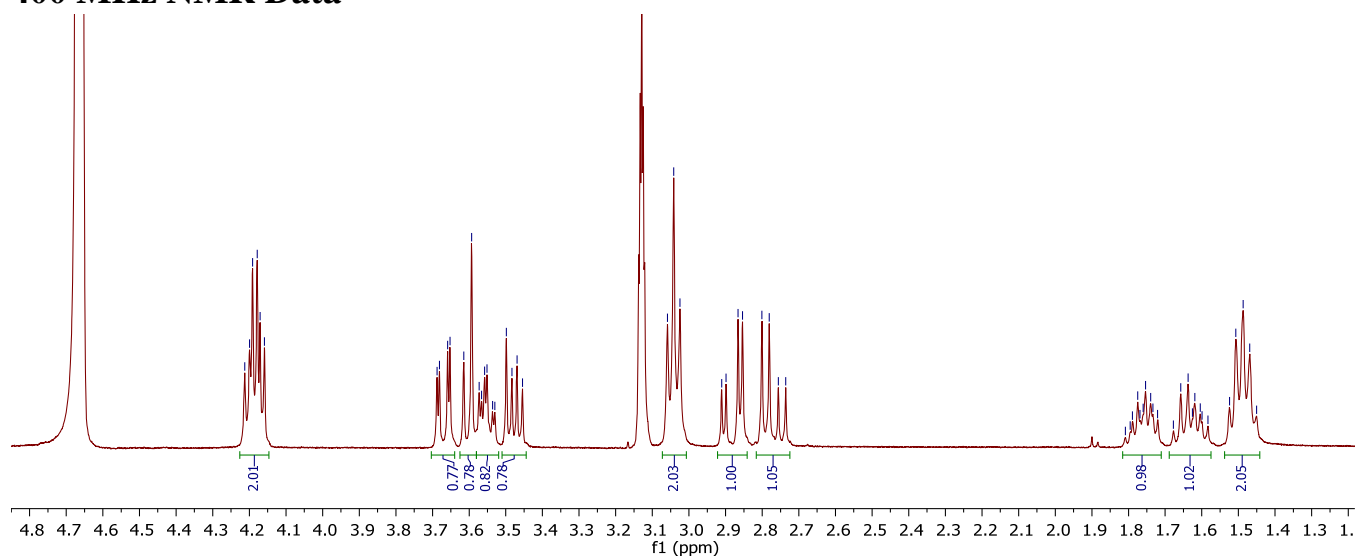

**Figure S10.** Full  $^1\text{H}$  NMR spectrum of DR (25 mM, 135  $\mu\text{L}$   $\text{D}_2\text{O}$ , 40  $\mu\text{L}$   $\text{CD}_3\text{OD}$ , 3 mm tube) with mannitol impurity at 400 MHz (298K).

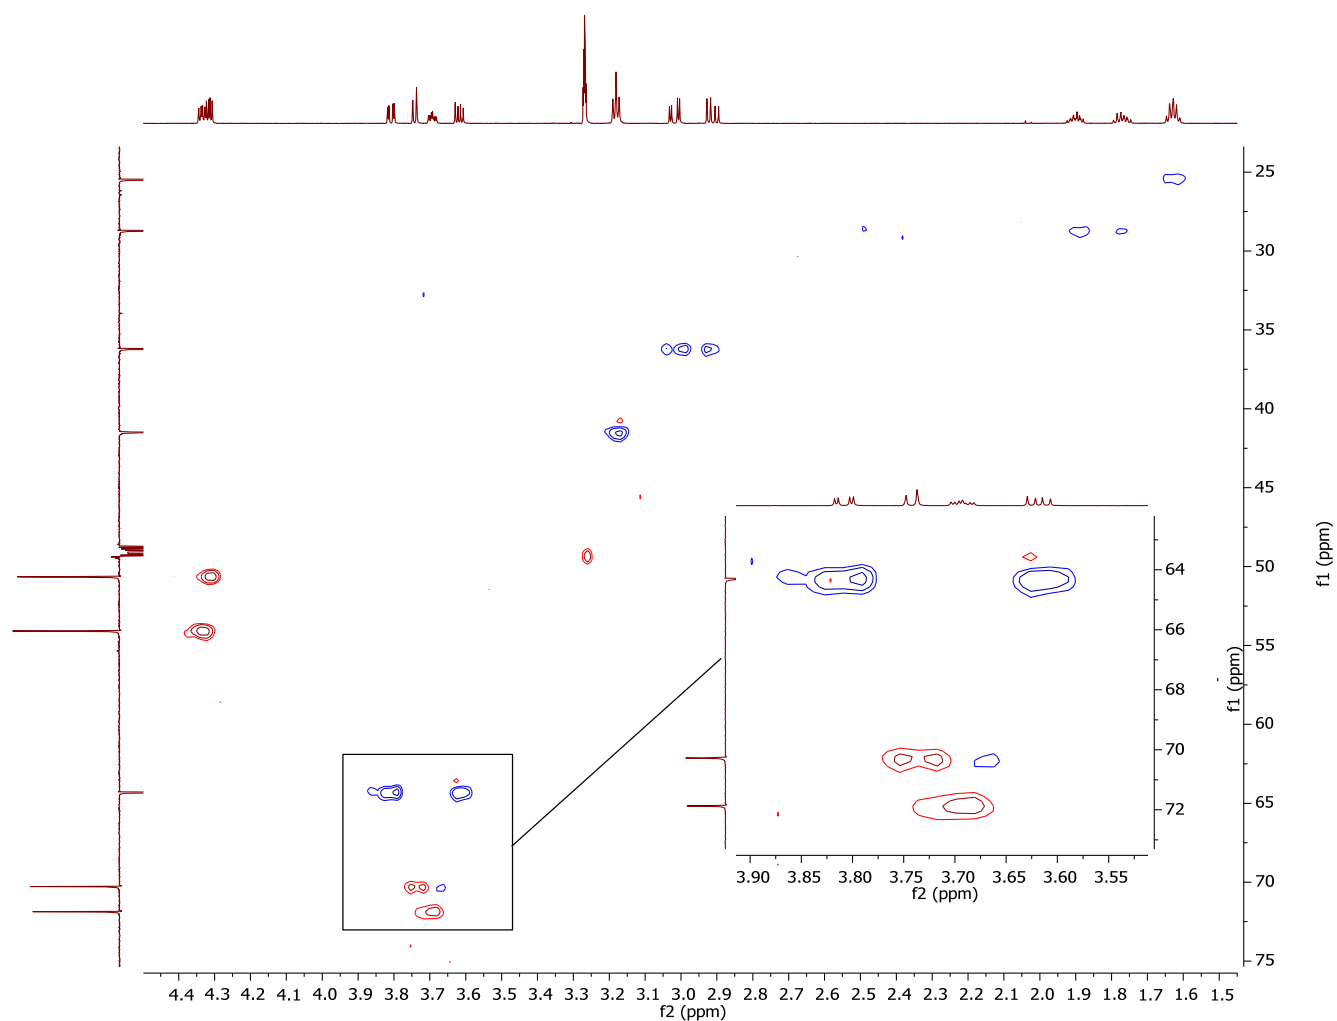

**Figure S11.**  $^1\text{H}/^{13}\text{C}$ -HSQC NMR spectrum of DR (25 mM, 135  $\mu\text{L}$   $\text{D}_2\text{O}$ , 40  $\mu\text{L}$   $\text{CD}_3\text{OD}$ , 3 mm tube) with expansion of the mannitol impurity at 400/100 MHz (298K).

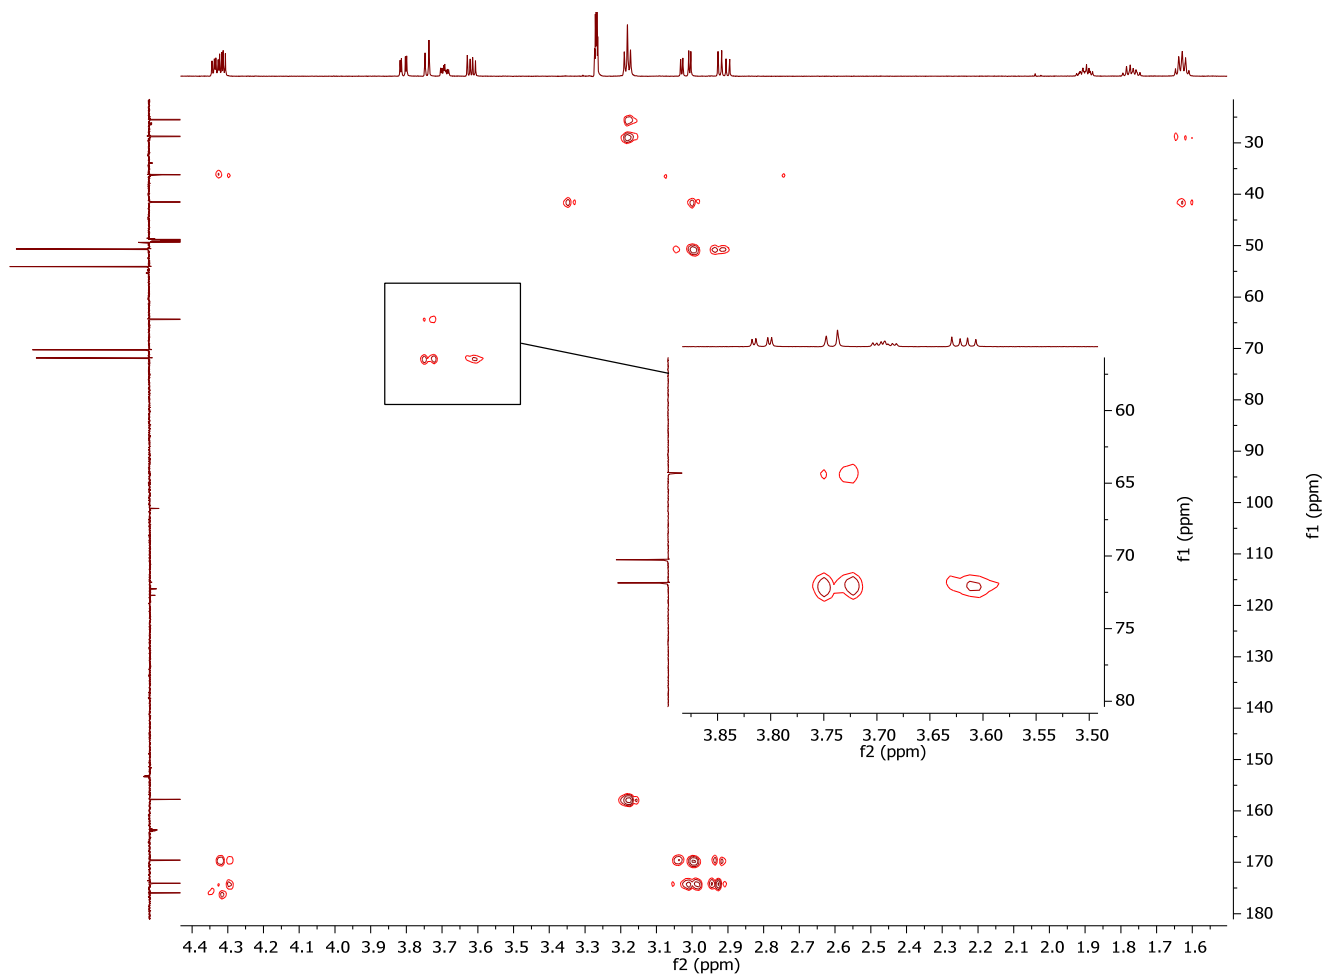

**Figure S12.**  $^1\text{H}/^{13}\text{C}$ -HMBC NMR spectrum of DR (25 mM, 135  $\mu\text{L}$   $\text{D}_2\text{O}$ , 40  $\mu\text{L}$   $\text{CD}_3\text{OD}$ , 3 mm tube) with expansion of the mannitol impurity at 400/100 MHz (298K).

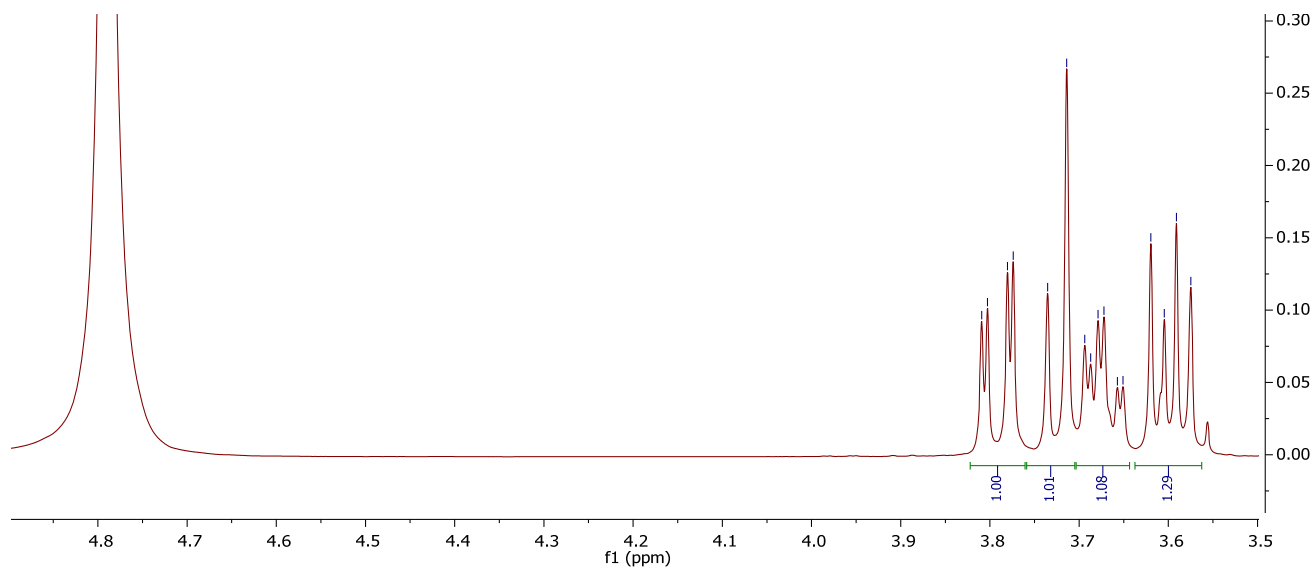

**Figure S13.**  $^1\text{H}$  NMR spectrum of mannitol (5.66 mg, 135  $\mu\text{L}$   $\text{D}_2\text{O}$ , 40  $\mu\text{L}$   $\text{CD}_3\text{OD}$ , 3 mm tube) at 400 MHz (298K).

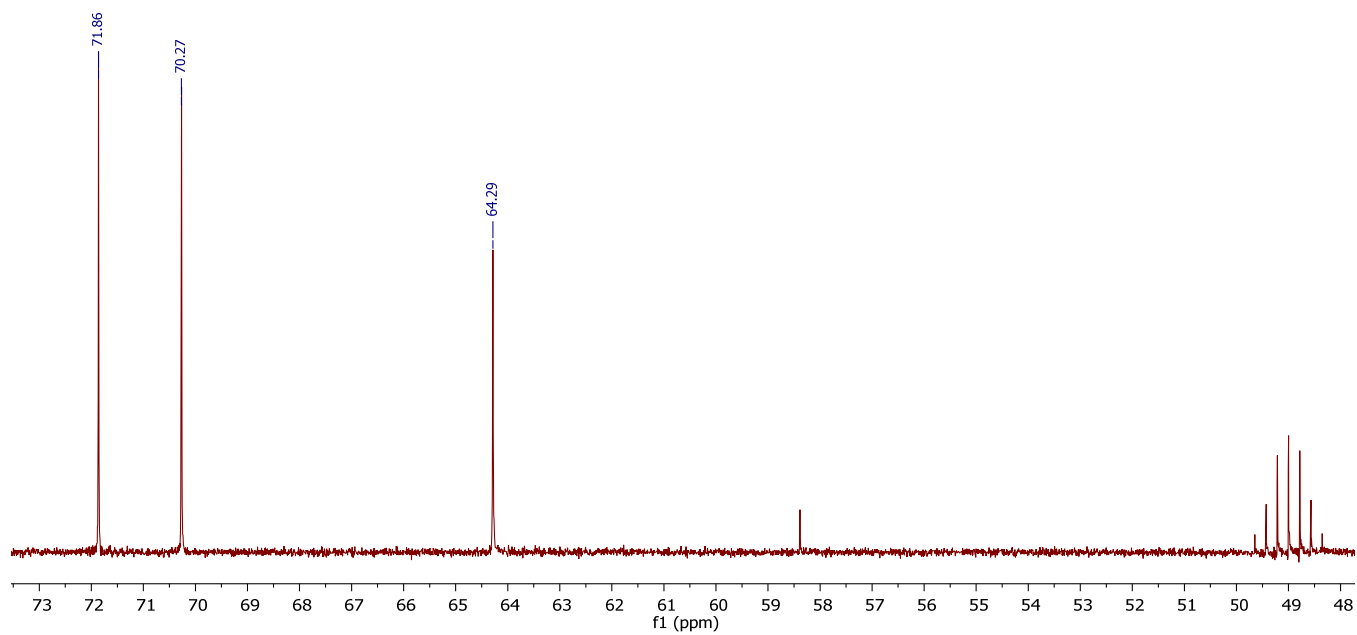

**Figure S14.**  $^{13}\text{C}$  NMR spectrum of mannitol (5.66 mg, 135  $\mu\text{L}$   $\text{D}_2\text{O}$ , 40  $\mu\text{L}$   $\text{CD}_3\text{OD}$ , 3 mm tube) at 100 MHz (298K).

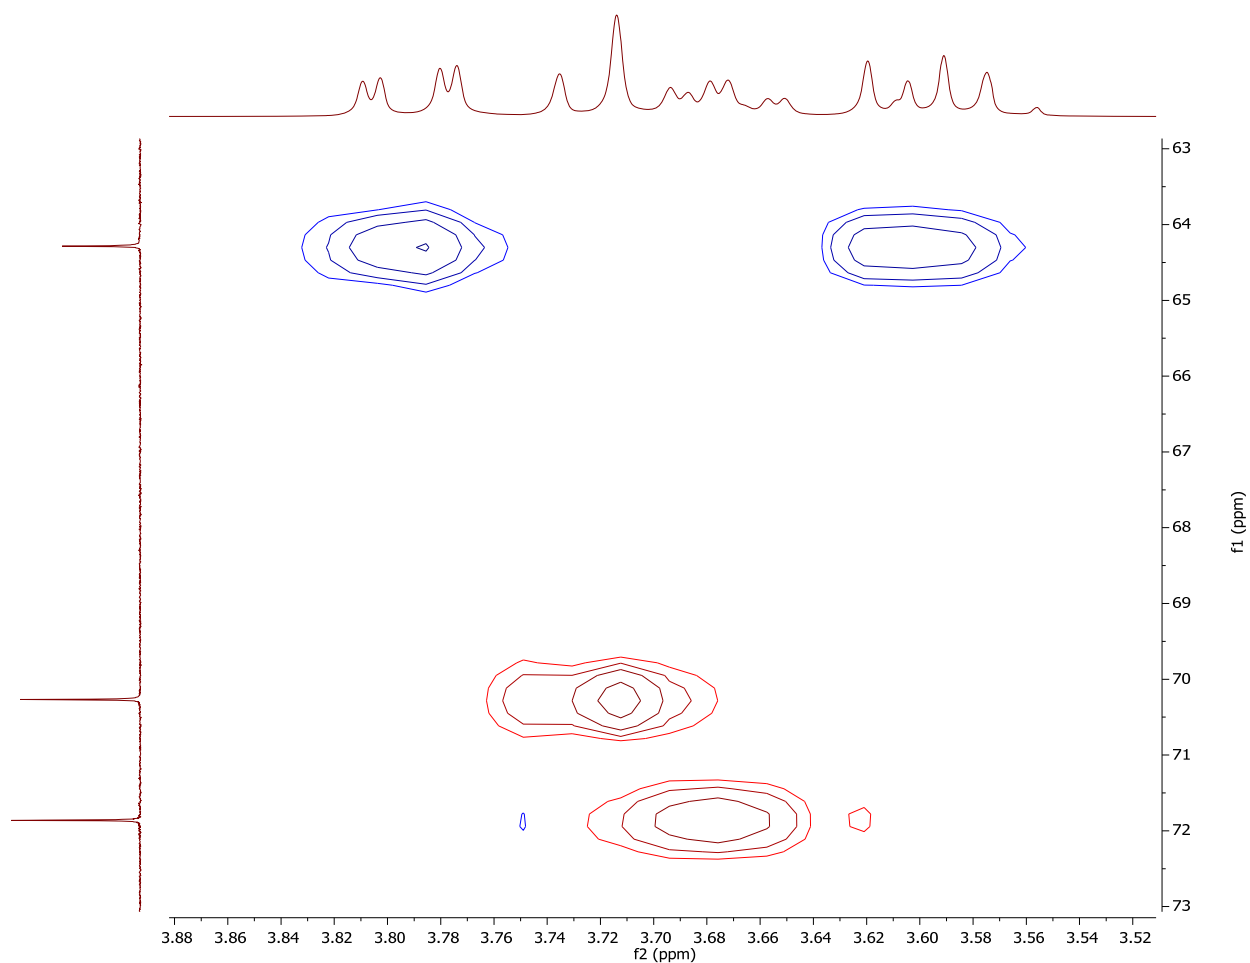

**Figure S15.**  $^1\text{H}/^{13}\text{C}$  HSQC spectrum of mannitol (5.66 mg, 135  $\mu\text{L}$   $\text{D}_2\text{O}$ , 40  $\mu\text{L}$   $\text{CD}_3\text{OD}$ , 3 mm tube) at 400/100 MHz (298K).

## 60 MHz NMR Data

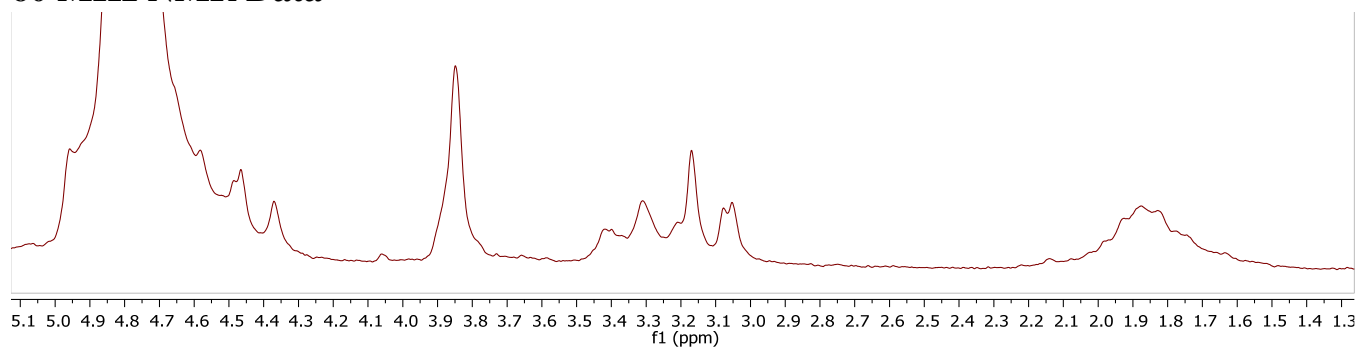

**Figure S16.** <sup>1</sup>H NMR spectra of DR (4 mg, 600 μL, D<sub>2</sub>O, 5 mm tube) at 60 MHz (305K).

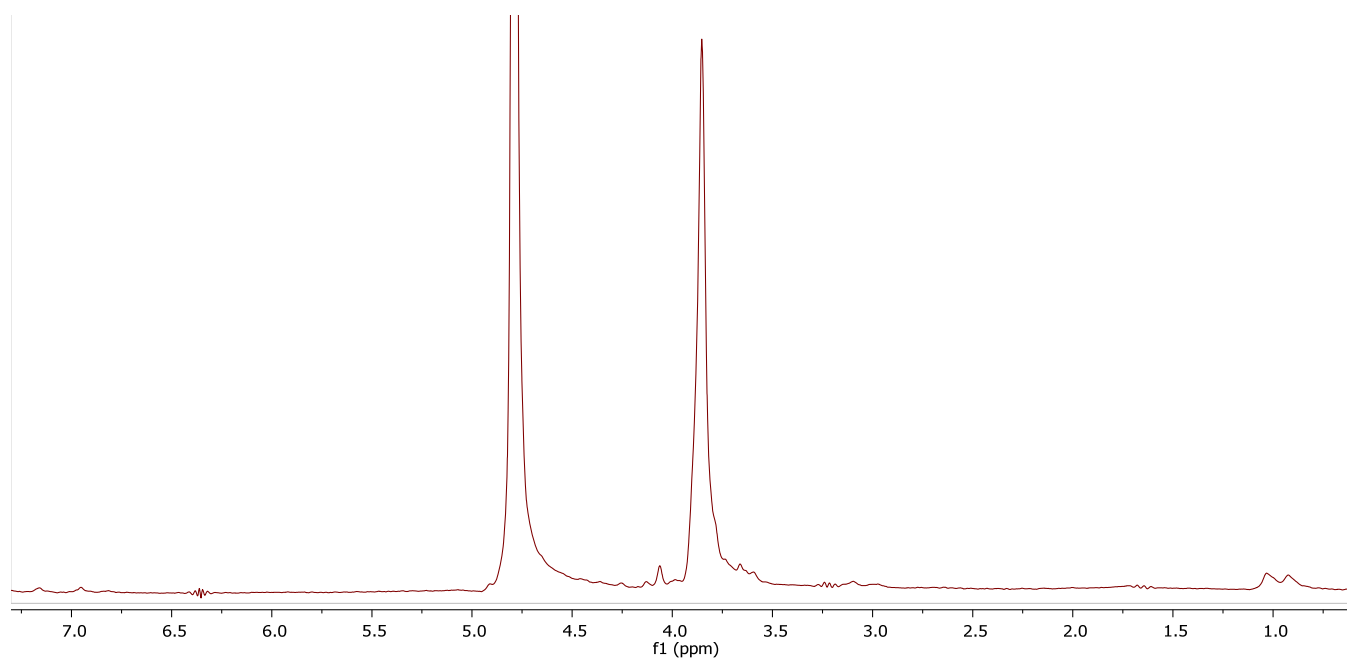

**Figure S17.** <sup>1</sup>H NMR spectra of DRVYI (4 mg, 600 μL, D<sub>2</sub>O, 5 mm tube) at 60 MHz (305K).

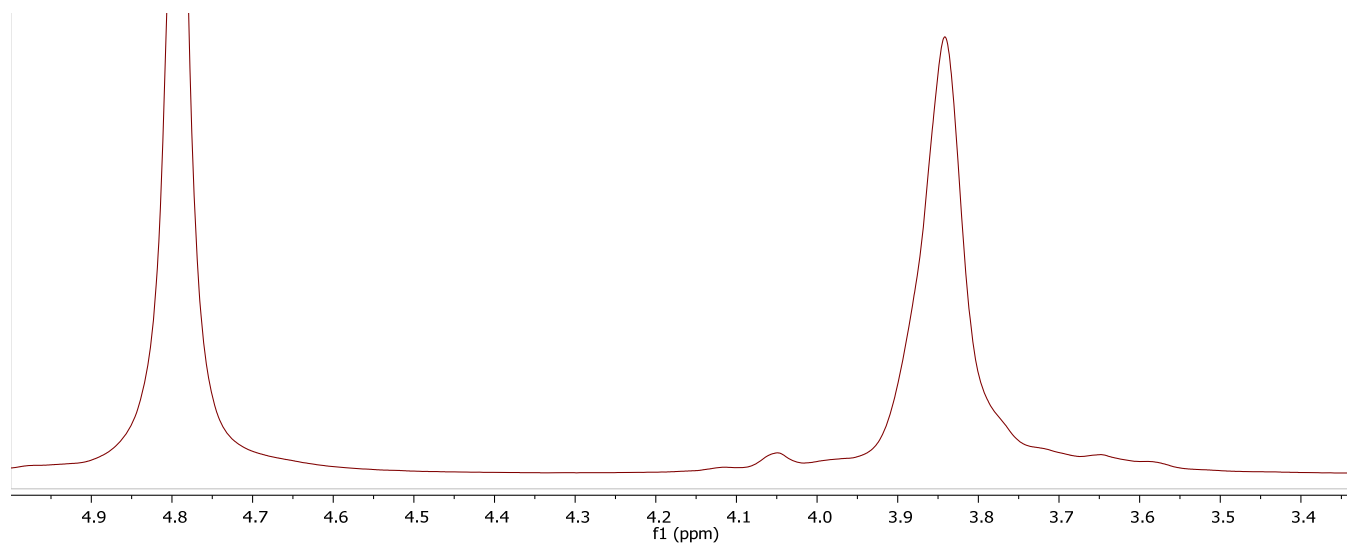

**Figure S18.** <sup>1</sup>H NMR spectra of mannitol (58 mg, 600 μL, D<sub>2</sub>O, 5 mm tube) at 60 MHz (305K).

## Comparisons

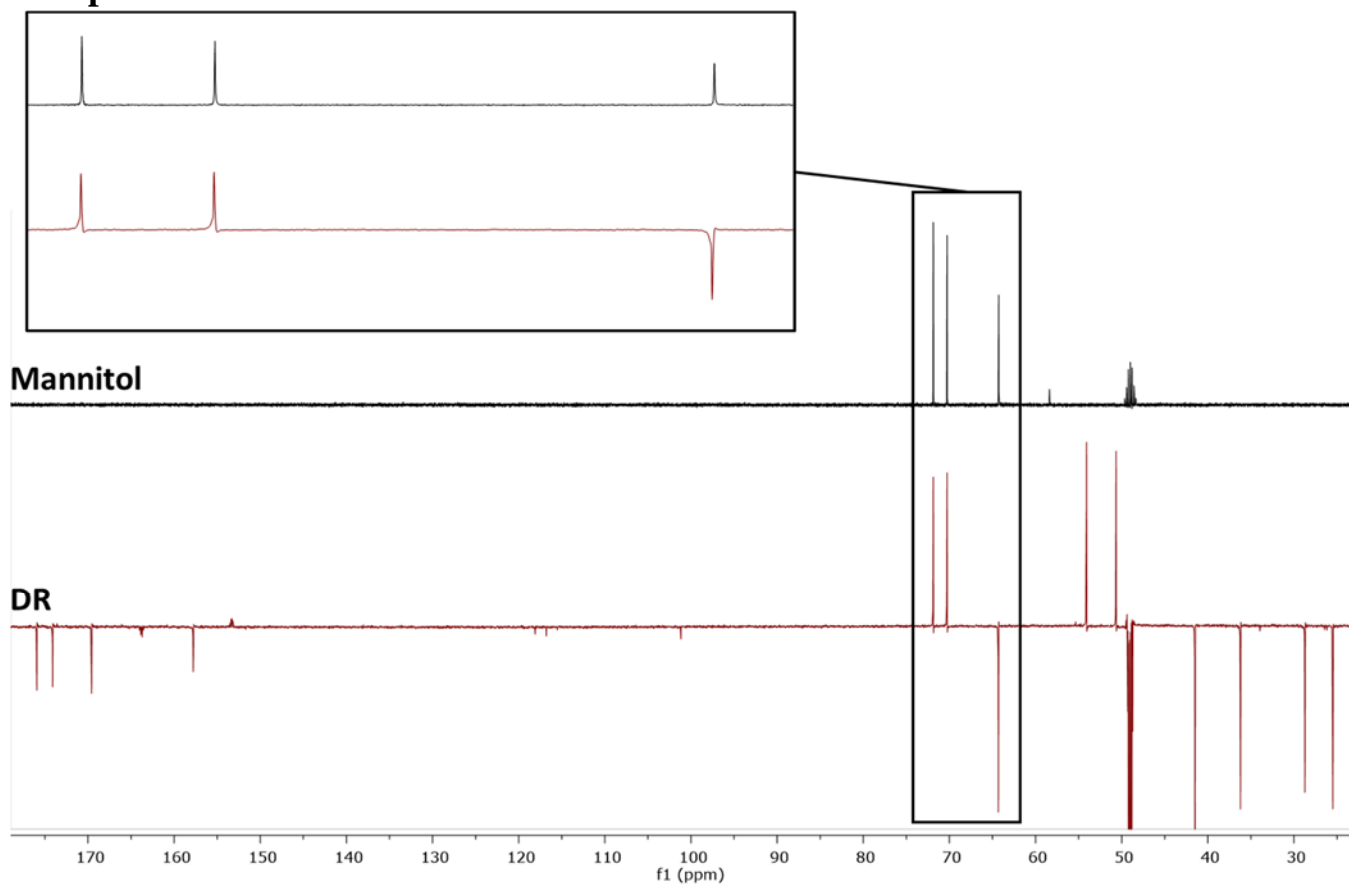

**Figure S19.**  $^{13}\text{C}$  NMR spectrum of mannitol at 100 MHz (top, black),  $^{13}\text{C}$ -DEPT-Q-135 NMR spectrum of DR at 225 MHz (bottom, red).

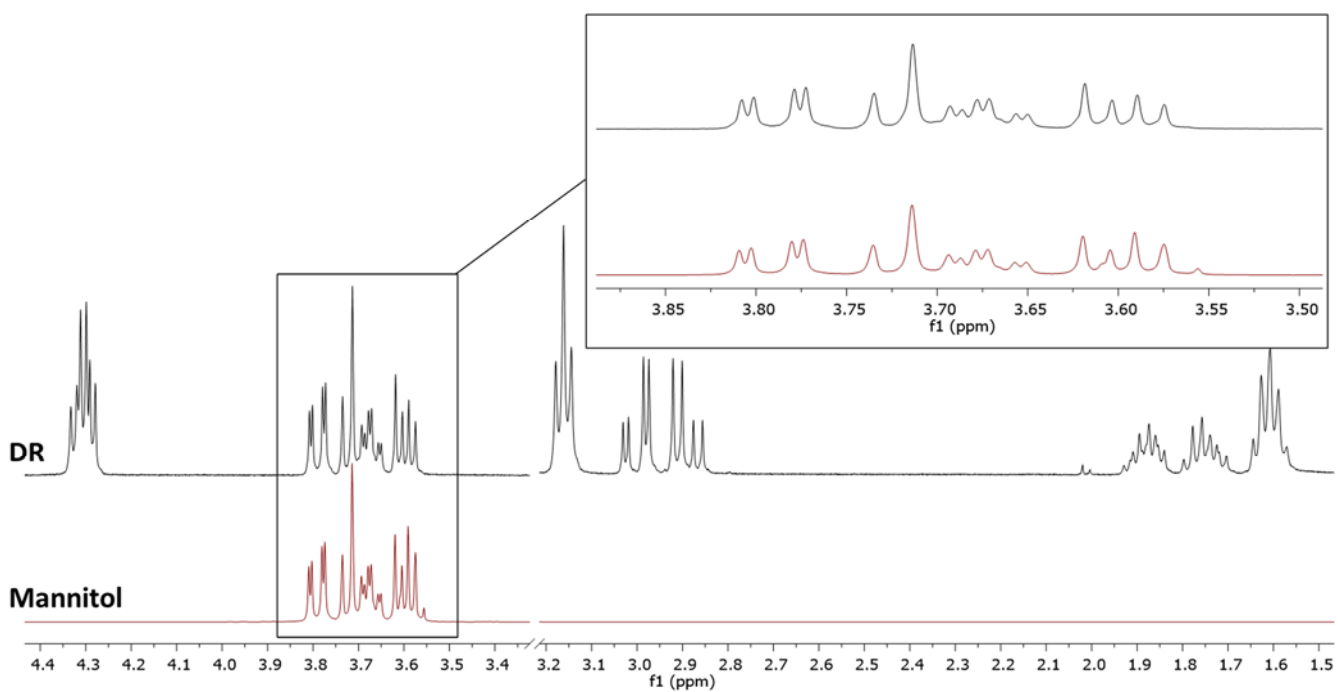

**Figure S20.**  $^1\text{H}$  NMR spectrum of DR (top, black) and mannitol (bottom, red) at 400 MHz.

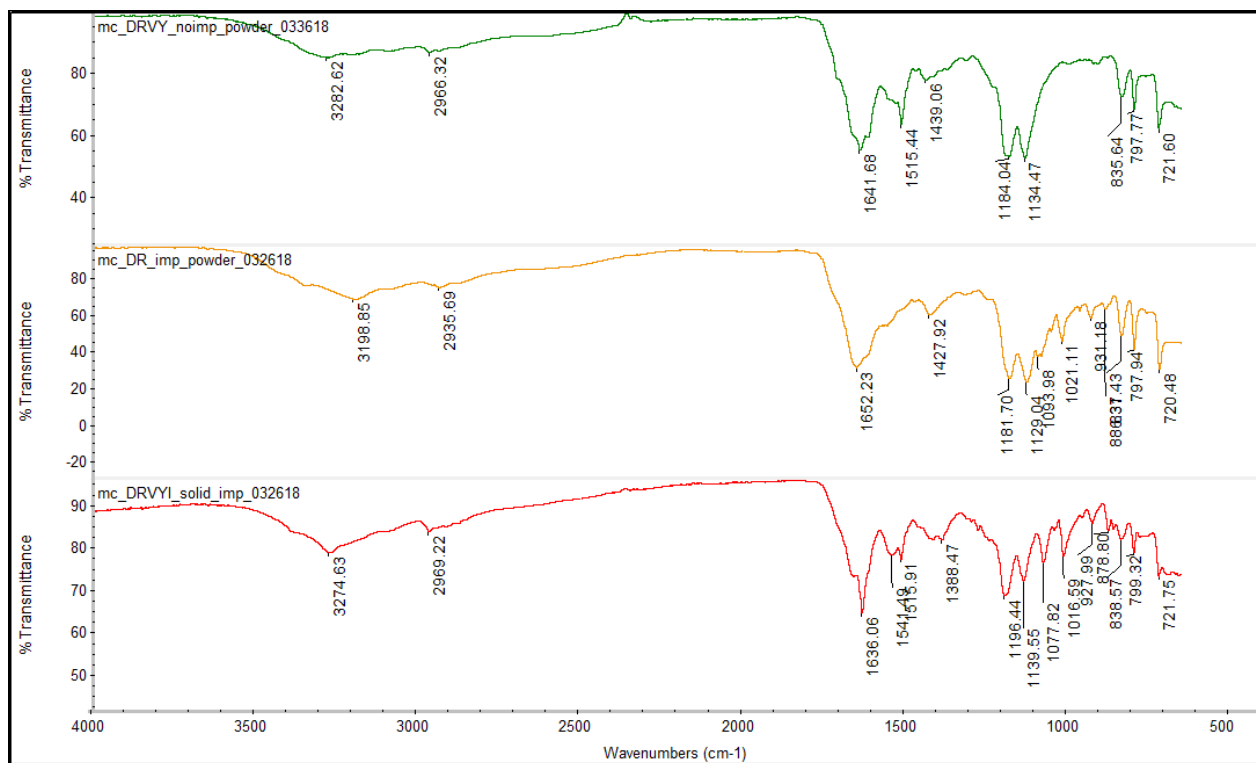

**Figure S21.** FT-IR chromatogram of DRVY (green) without the impurity versus DR (orange) and DRVYI (red) which both contain the impurity.

## HiFSA Analysis

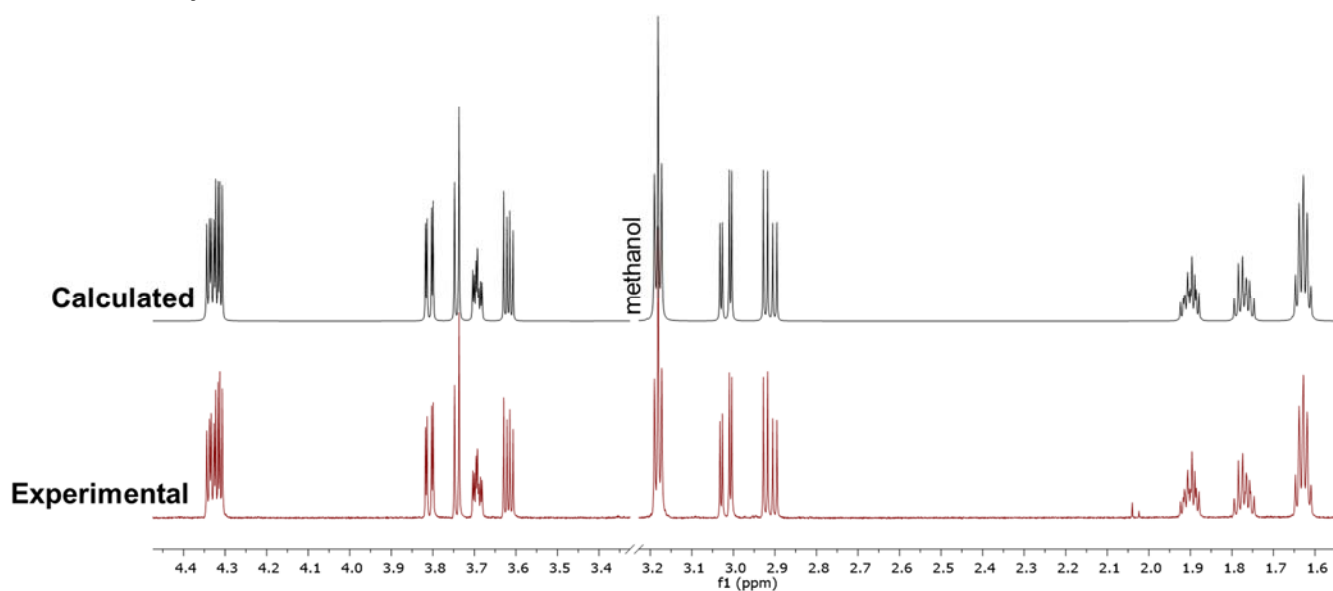

**Figure S22.** HiFSA calculated  $^1\text{H}$  NMR spectrum of DR (black, top) versus experimental (red, bottom) at 800 MHz.

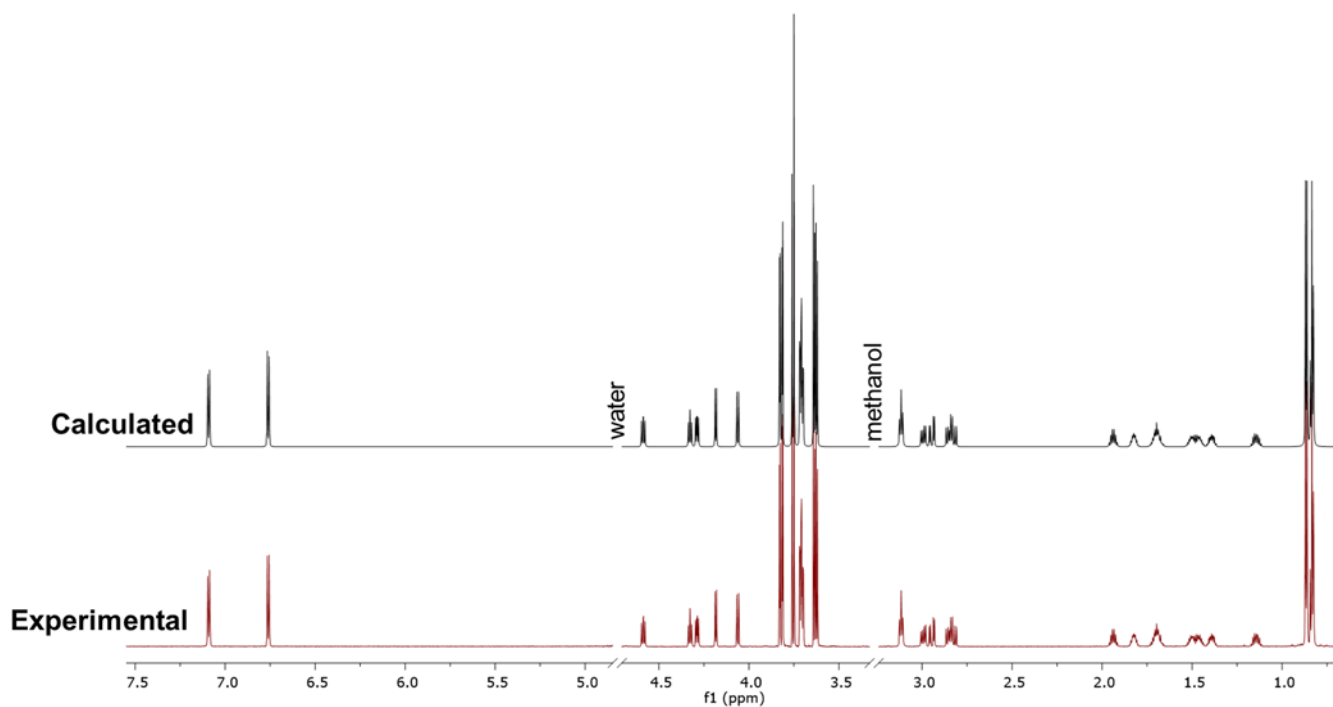

**Figure S23.** HiFSA calculated  $^1\text{H}$  NMR spectrum of DRVYI (black, top) versus experimental (red, bottom) at 800 MHz.



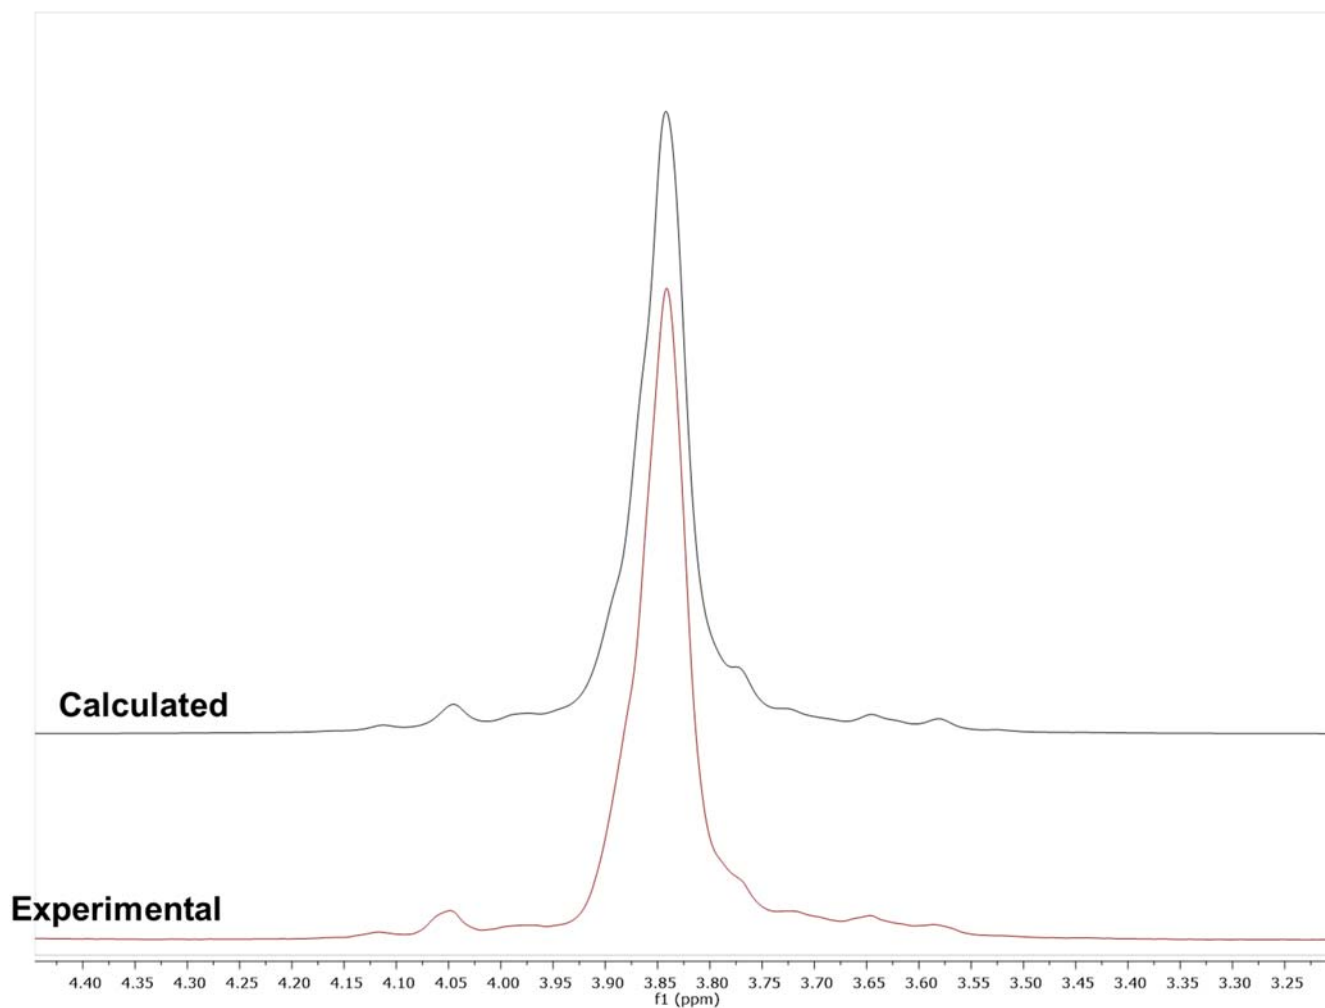

**Figure S24.** HiFSA calculated  $^1\text{H}$  NMR spectrum of mannitol (black, top) versus experimental (red, bottom) at 60 MHz.

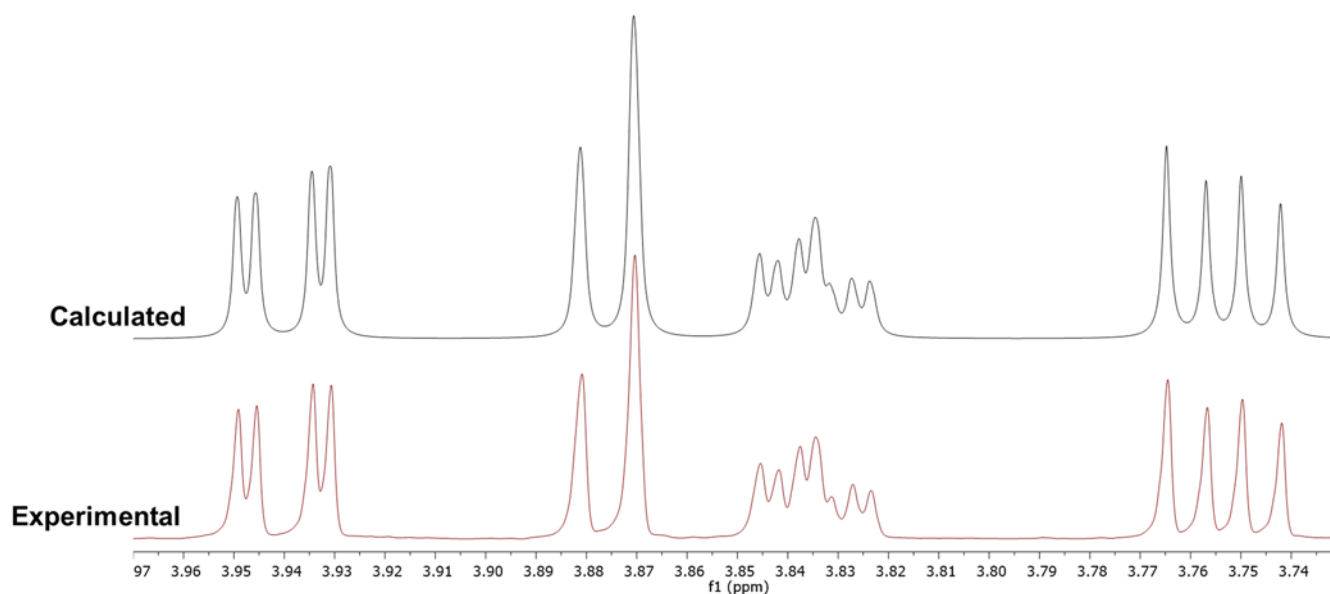

**Figure S25.** HiFSA calculated  $^1\text{H}$  NMR spectrum of mannitol (black, top) versus experimental (red, bottom) at 800 MHz.

**Figure S26.** MS analysis of DR.

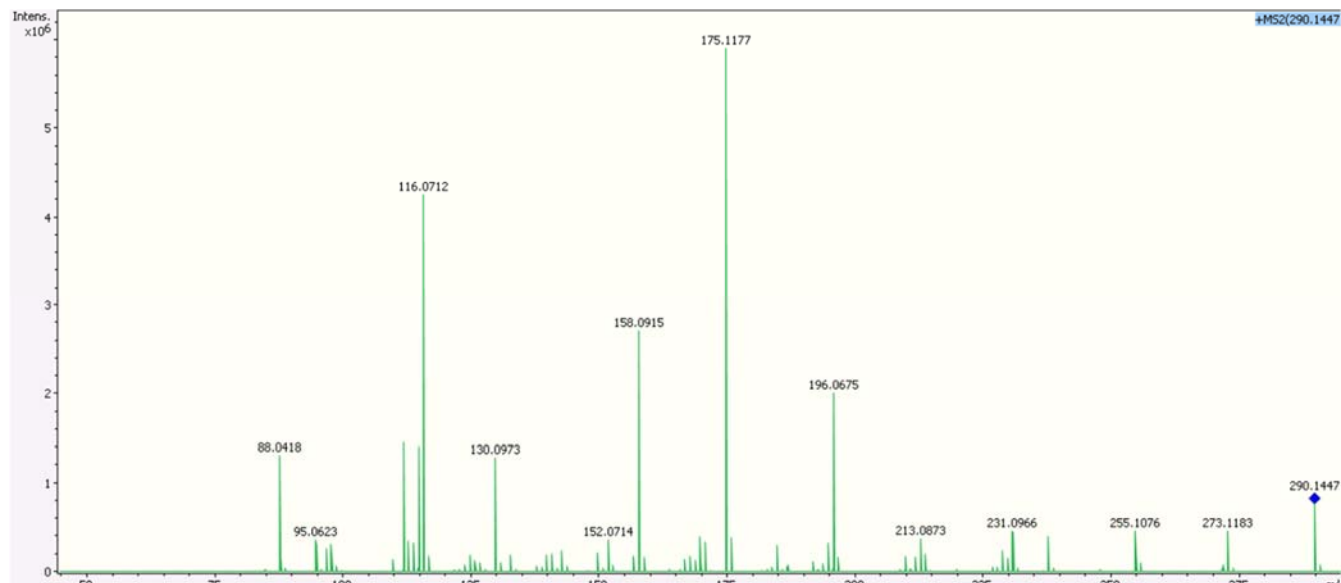

$C_{10}H_{20}N_5O_5$  Calculated mass 290.1459 [M+H<sup>+</sup>] Observed mass 290.1451 (err 2.8 ppm)

Visible ions in fragmentation @ 30 eV

a1: 88.0418 (for 88.03935)

a2: 244.1405 (for 244.14046) (minor)

b1: 116.0712 (for 116.03426)

b2: 272.1354 (for 272.13537) (minor)

c1: 133.0616 (for 133.06081) (minor)

x2: 201.0972 (for 201.09826) (minor)

y1: 290.1447 (for 290.14594) (full peptide)

y2: 175.1177 (for 175.11900)

z1: 273.1183 (for 273.12049)

z2: 158.0915 (for 158.09354)

**Figure S27.** MS analysis of DRVYI with mannitol contaminant.

### MS Spectrum

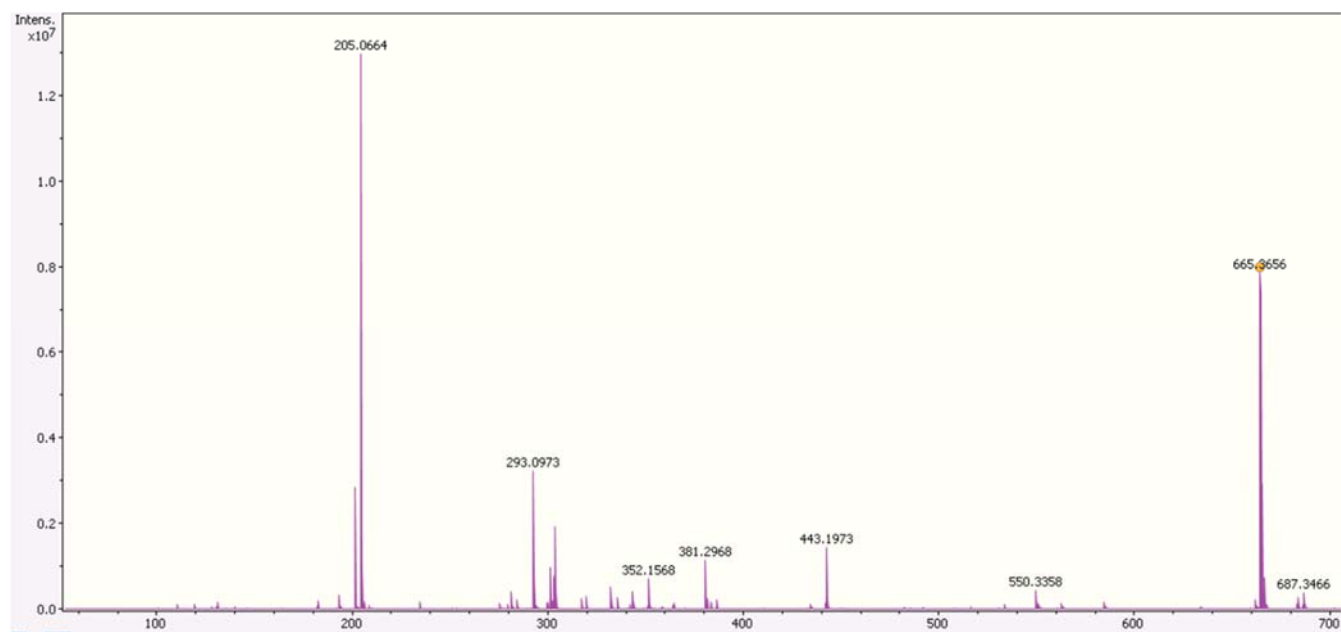

$C_{30}H_{48}N_8O_9$  Calculated mass 665.3617 [M+H<sup>+</sup>] Observed mass 665.3617 (err 5.8 ppm) [M+H<sup>+</sup>]

### Mannitol region

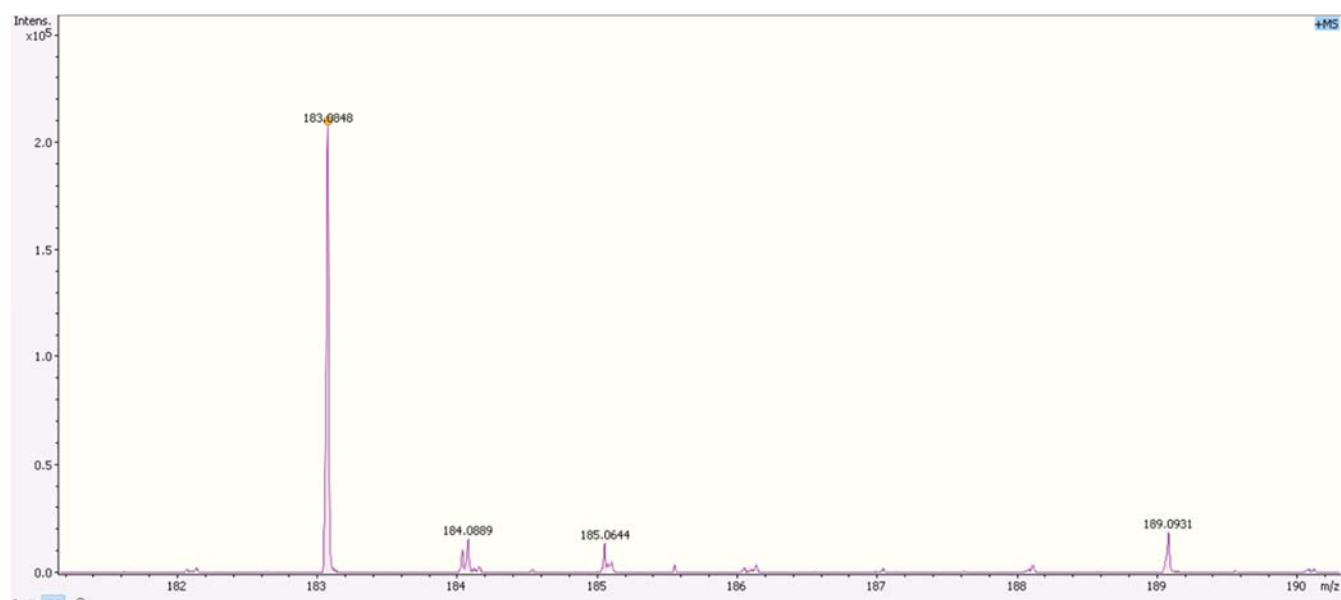

### Mannitol observed:

[M+H] 183.0848 observed for 183.0863 calculated (err 8.0 ppm)

[M+Na] 205.0664 observed for 205.0683 calculated (err 9.0 ppm)

## MS<sup>2</sup> (40 eV)

a1 non visible (for 88.03935)  
a2 non visible (for 244.14046)  
a3 343.1742 (for 343.20887)  
a4 non visible (for 506.27220)  
a5 non visible (for 619.35627)  
b1 non visible (for 116.03426)  
b2 272.1182 (for 272.13537)  
b3 371.1820 (for 371.20379)  
b4 534.2319 (for 534.26712)  
b5 647.3218 (for 647.35118)  
c1 non visible (for 133.06081)  
c2 non visible (for 289.16192)  
c3 non visible (for 388.23034)  
c4 551.2947 (for 551.29367) (uncertain, in the noise)  
x2 non visible (for 576.31407)  
x3 non visible (for 420.21296)  
x4 non visible (for 321.14454)  
x5 non visible (for 158.08121)  
y1 665.3303 (for 665.36174) (noisy)  
y2 550.3138 (for 550.33480)  
y3 394.2109 (for 394.23369)  
y4 295.1461 (for 295.16528)  
y5 non visible (for 132.10195)  
z1 648.2798 (for 648.33629)  
z2 unconclusive (for 533.30935)  
z3 non visible (for 377.20824)  
z4 278.1159 unconclusive (for 278.13983)  
z5 non visible (for 114.07650)

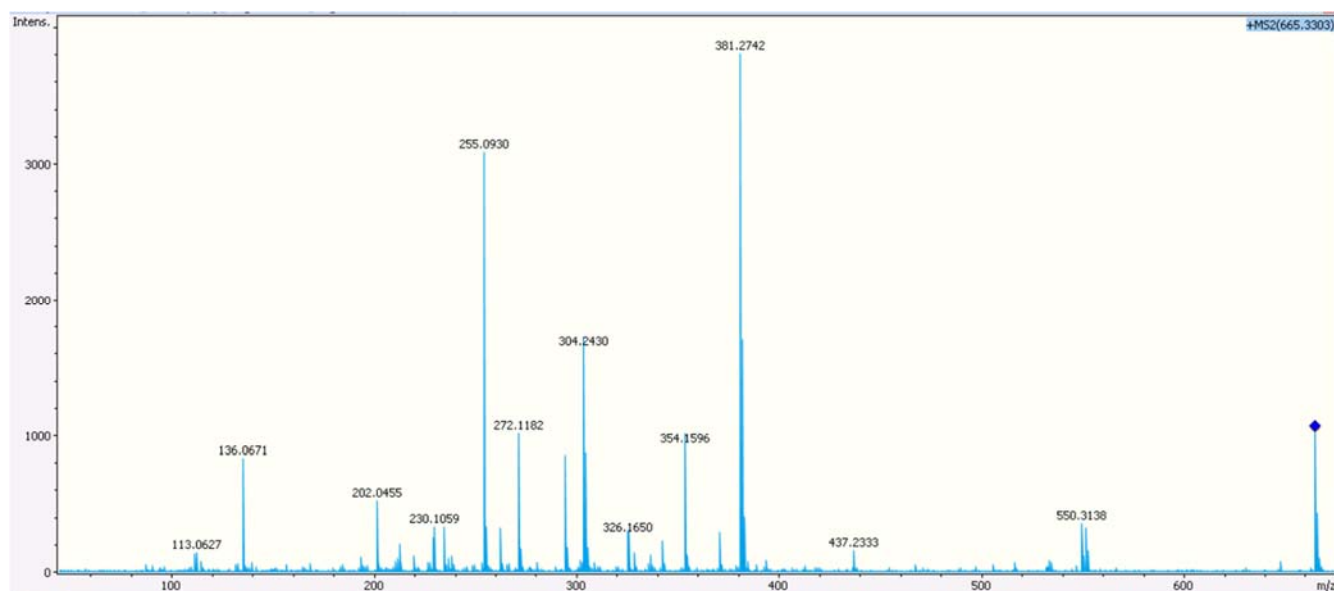

Supplement: NIHMS1545661-supplement-1.pdf [file NIHMS1545661-supplement-1.pdf]
